# Supplementary material for: Network Analysis of Exercise Atmosphere and Aging Attitudes
Source: Research Square preprint supplement (doi:10.21203/rs.3.rs-6537503/v1), 2025-06-04

**Supplementary 1**

***Weightself - Stigma Questionnaire***

1. I'll always go back to being overweight
2. I caused my weight problems
3. I feel guilty because of my weight problems
4. I became overweight because I'm a weak person
5. I would never have any problems with my weight if I were stronger
6. I don't have enough self - control to maintain a healthy weight maintain a healthy weight
7. I feel insecure about others' opinions of me
8. People discriminate against me because I've had weight problems
9. It's difficult for people who haven't had weight problems to relate to me
10. Others will think I lack self - control because of my weight problems
11. People think that I am to blame for my weight problems
12. Others are ashamed to around me because of my weight

***Exercise Self-efficacy***

1.On most days of the week, I exercise.

2.I can ask my parents or other adults to exercise with me.

3.Even when I could watch TV or play video games, I can still exercise on most days of the week during my free time.

4.Even if it is extremely hot or cold outside, I can still exercise on most days of the week.

5.I can ask my best friends to exercise with me on most days of the week.

6.Even when I'm at home, I can still exercise.

7.I can exercise because I know how to exercise.

8.No matter how busy I am, I can still exercise during my free time on most days of the week.

***Non-suicidal Self-injury***

1.Intentionally harm oneself

2.Intentionally hit one's head against hard objects (such as walls, trees)

3.Intentionally hit one's head against soft objects (such as pillows)

4.Intentionally punch hard objects like walls, tables, windows, the ground.

5.Intentionally injure oneself with fists, slaps, or hard objects

6.Intentionally prick oneself (needles, staples, pen tips)

7.Intentionally pull one's own hair and eyelashes

8.Intentionally bite oneself

9.Intentionally pull out one's own hair

10.Intentionally burn oneself with cigarette butts (such as cigarette butts, boiling water, lighters, or matches)

11.Intentionally rub the skin with something to make it bleed or cause bruising

12.Intentionally scratch words or symbols on the skin (excluding tattoos)


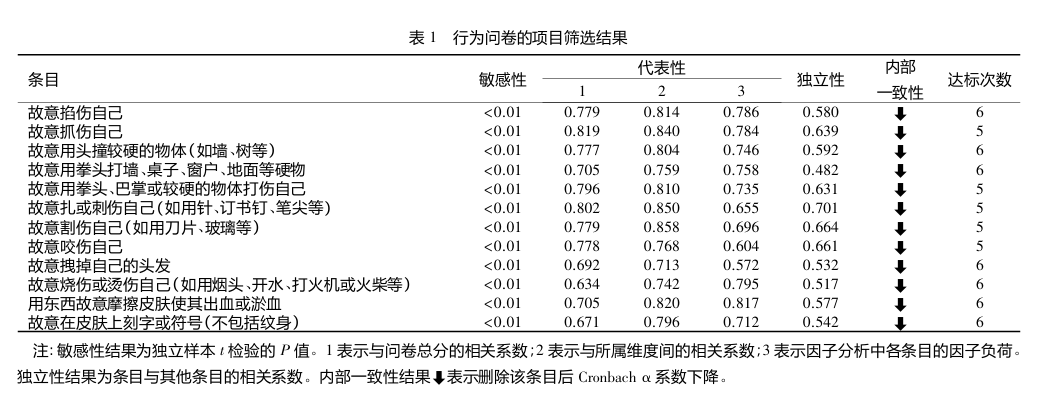

Supplement: Supplementary file 1 [file fc5615ca689bfbce76413166.docx]
